# Supplementary material for: Novel population of human monocyte and osteoclast progenitors from pluripotent stem cells and peripheral blood
Source: PubMed Central journal article supplement — Blood Adv. 2021 Nov 2;5(21):4435–46. doi: 10.1182/bloodadvances.2021004552 (PMC8579260; doi:10.1182/bloodadvances.2021004552), 2021-11-02
Supplement: advancesADV2021004552-suppl1.pdf [file advancesADV2021004552-suppl1.pdf]

## Supplementary Data

### Additional Methods

#### *Flow cytometry analyses and cell sorting*

Except for floating cells, all cells prepared for flow cytometry analysis or sorting were harvested using enzymatic treatment (as described for EB and attached cultures). All cells were extensively washed, filtered through 70  $\mu\text{m}$  Nitex, and suspended in Staining Media (SM) containing 2% Newborn Calf Serum, 1X HBSS, and 1mM Hepes. Prior to antibody staining, cell pellets were blocked with a solution of 0.1 mg/ml mouse IgG (Sigma -I08765) for 10 min and then stained at 1 million cells per 100  $\mu\text{l}$  antibody cocktail. The volume of antibody was increased proportionally to cell number. Monoclonal antibodies directly conjugated to fluorochromes were used in cocktails with up to 6 antibodies. All antibodies were purchased from eBioscience and BioLegend and titrated for optimal dilutions prior to use. The specificities of each antibody can be found in Table S1. All stainings were done on ice in the dark for 45 mins. Cells were then washed with 3 mls of SM and finally resuspended in SM containing 1  $\mu\text{g/ml}$  of Propidium Iodide (PI). Flow cytometric analysis and sorting was done using a BD-FACS ARIA II (BD Biosciences; San Jose, CA, USA) equipped with 5 lasers, 18 fluorescence detectors and FACS DIVA software. Voltages were set with unstained sample and compensations were established with positive signals for each channel. Gating strategies for monocyte/osteoclast progenitors derived from hESCs (Figure S1) and for human PB (Figure S3) can be found in the supplemental material. Cell sorting was done using a 100  $\mu\text{m}$  nozzle and sorted into SM supplemented with 20% FBS. All sorts were reanalyzed for purity greater than 95% or they were not used in experiments. For experiments requiring very small populations or more than 4 populations to be sorted, cells were sorted multiple times. FACS data was analyzed using BD CellQuest Pro<sup>TM</sup> Software.

#### *Myeloid gene expression*

RNA was extracted using the RNAqueous<sup>®</sup>-4PCR Kit (Ambion<sup>®</sup>; Foster City, CA, USA) per manufacturer's instructions for the following cell types: Undifferentiated hESCs, EBs prior to

cytokine induction, EBs with 22 days of hematopoietic induction with bmp4, GCSF, SCF, FLT3L, IL-3, IL-6, myeloid progenitors cultured for 15 days in SCF, FL3L and MCSF and multinuclear osteoclasts cultured for 15 days in SCF, FL3L and MCSF with addition of RANKL the last 6 days. EBs and hESCs grown on Matrigel™ were first enzymatically digested with trypsin and then washed. Myeloid progenitors required trituration to harvest and multinuclear osteoclasts were lysed directly on the TC plate. Prior to reverse transcription, RNA was DNase I treated, quantified and evaluated for purity using nanodrop 260/280 absorbances. Next, 1 ug of RNA was reverse transcribed into cDNA using SuperScript III (Invitrogen™ 18080; Life Technologies, Grand Island, NY, USA) per manufacturer's guidelines. QPCR using TaqMan Universal PCR Master Mix (Applied Biosystems, ABI®; Foster City, CA, USA) along with TaqMan® Gene Expression Assays for the following genes: *ACP5*, *CSF1R*, *CTSK*, *MMP9*, *OSCAR*, and *TNFR11A* (details of assays can be found in Table S2) was performed in triplicate on an ABI® 7900-HT Fast Real-Time System. Samples were normalized to the endogenous control *GAPDH* and then relative gene expression was calculated based on undifferentiated hESCs using the software provided.

**Table S1: Antibodies used to define cell populations**

| <b>Antibody</b>       | <b>Clone</b> | <b>Company</b> |
|-----------------------|--------------|----------------|
| CD11b APC             | ICRF44       | BioLegend      |
| CD11b PE/Cy7          | ICRF44       | BioLegend      |
| CD11c PerCP/Cy5.5     | Bu15         | BioLegend      |
| CD11c Alexa Fluor®700 | 3.9          | eBioscience    |
| CD14 FITC             | 61D3         | eBioscience    |
| CD14 PE               | 61D3         | eBioscience    |
| CD14 eFluor®450       | 61D3         | eBioscience    |
| CD14 APC eFluor®780   | 61D3         | eBioscience    |
| CD15 FITC             | HI98         | eBioscience    |
| CD16 eFluor®450       | CB16         | eBioscience    |
| CD19 APCe780          | HIB19        | eBioscience    |
| CD19 Alexa Fluor®700  | HIB19        | eBioscience    |
| CD34 FITC             | 581          | BioLegend      |
| CD34 Pacific Blue®    | 581          | BioLegend      |
| CD40 FITC             | 5C3          | eBioscience    |
| CD45 FITC             | 2D1          | eBioscience    |
| CD45 eFluor®450       | HI30         | eBioscience    |
| CD45 APC eFluor®780   | HI30         | eBioscience    |
| CD56 Alexa Fluor®700  | HCD56        | BioLegend      |
| CD80 PE               | 2D10         | eBioscience    |
| CD83 APC              | HB15e        | eBioscience    |
| CD86 PE/Cy7           | IT2.2        | eBioscience    |
| CD115 PE              | 9-4D2-1E4    | BioLegend      |
| CD115 PE              | 12-3A3-1B10  | eBioscience    |
| CD169 PE              | 7-239        | eBioscience    |
| CD209 PE/Cy7          | H209         | eBioscience    |
| CD235ab APC           | HIR2         | BioLegend      |
| CX3CR1 APC            | 2A9-1        | BioLegend      |
| CX3CR1 FITC           | 2A9-1        | BioLegend      |
| HLA-DR eFluor®450     | L243         | eBioscience    |

**Table S2: Genes considered for defining of osteoclast lineage progression**

| <b>Gene Symbol</b> | <b>Assay ID</b> | <b>Gene name</b>                                              |
|--------------------|-----------------|---------------------------------------------------------------|
| ACP5               | Hs00356261_m1   | Acid phosphatase 5, tartrate resistant (TRAP)                 |
| CSF1R              | Hs00911250_m1   | Colony stimulating factor 1 receptor (C-FMS)                  |
| CTSK               | Hs00166156_m1   | Cathepsin K (CATK)                                            |
| GAPDH              | Hs99999905_m1   | Glyceraldehyde-3-phosphate dehydrogenase<br>(GAPDH)           |
| MMP9               | Hs00234579_m1   | Matrix metalloproteinase 9 (MMP9)                             |
| OSCAR              | Hs01100185_m1   | Osteoclast associated immunoglobulin-like<br>receptor (OSCAR) |
| RN18S1             | Hs03928985_g1   | RNA, 18 S ribosomal 1 (R18S)                                  |
| TNFRSF11A          | Hs00187192_m1   | Tumor necrosis factor superfamily, member 11a<br>(RANK)       |

## Supplemental Figure 1

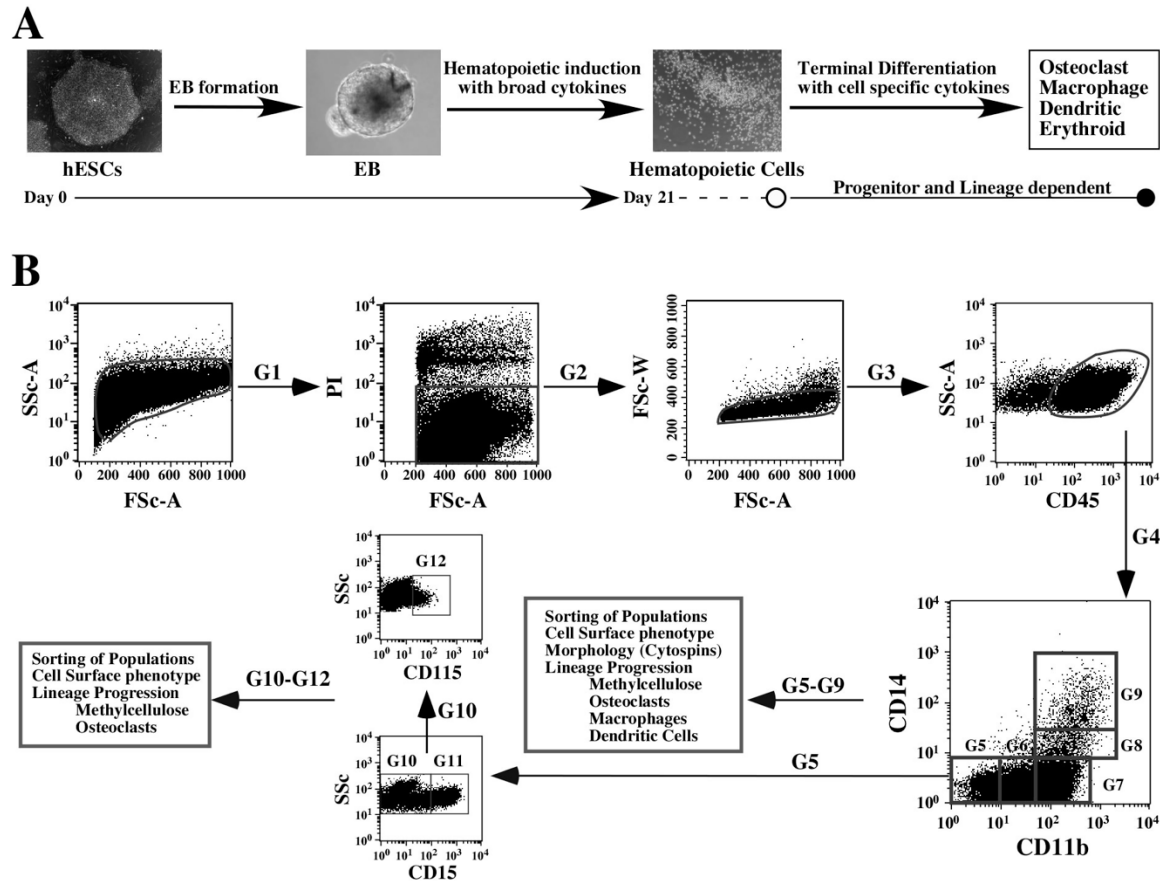

**Figure S1. Generation of monocyte progenitors from hESCs.** **A)** Undifferentiated hESC colonies were grown until 90% confluent and then enzymatically digested to recover multicellular aggregates. Aggregates were placed in low attachment flasks and allowed to form EBs overnight. A differentiation media containing six hematopoietic inducing cytokines (bmp4, GCSF, SCF, FLT3L, IL-3, IL-6) was added the following day and cultures were maintained under these conditions until at least day 21 when the emergence of large amounts of CD45<sup>+</sup> cells were visible. Cultures were either continued in order to increase numbers of hematopoietic progenitors or they were sorted and placed into lineage specific inducing conditions MCSF for macrophages, MCSF and RANKL for osteoclasts, GMCSF and IL4 for dendritic cells, or myeloid-erythroid methylcellulose for CFU experiments. **B)** Flow cytometry gating strategy to purify hematopoietic cells with myeloid potential included exclusion of dead cells with

Propidium Iodide (PI) staining, doublets (FSc-W and FSC-A), and non-hematopoietic components by gating for only CD45<sup>+</sup> cells. Cells within these gates were used to dissect myeloid populations using the myeloid markers CD14 and CD11b which were analyzed in the context of other markers, their ability to progress to terminally differentiated myeloid cells and for their progenitor activity. Finer dissections within the identified progenitor population were analyzed in the same fashion using CD15 and CD115 antibodies.

## Supplemental Figure 2

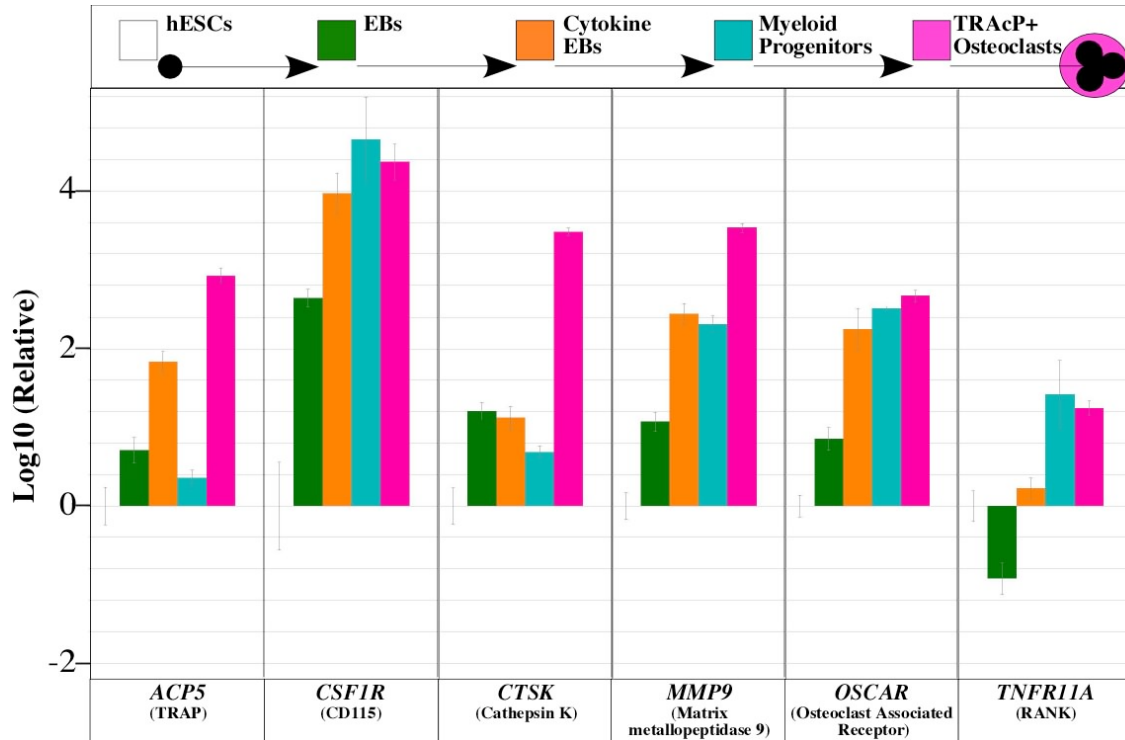

**Figure S2. Upregulation of myeloid and osteoclast gene expression.** Relative gene expression of myeloid and osteoclast specific genes compared to undifferentiated hESCs throughout the different stages of commitment towards osteoclast generation. Osteoclast specific transcripts TRAP, CatK, and MMP9 are preferentially expressed in the mature osteoclast fraction.

*EBs* represent bulk culture prior to cytokine addition; *Cytokine EBs* represent cultures for 22 days in Cyto6 cocktail (see methods); Dissociated Day 22 Cytokine EBs were then cultured for 15 days in SCF, FL3L and MCSF representing *Myeloid progenitors* or cultured for 15 days in SCF, FL3L and MCSF with addition of RANKL the last 6 days to represent multinuclear *Osteoclasts*.

### Supplemental Figure 3

**A**

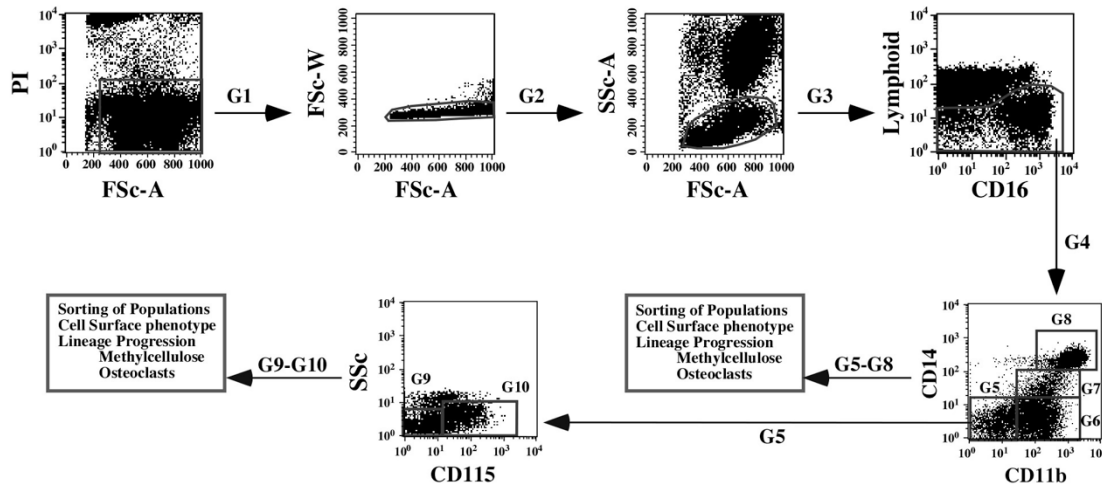

**B**

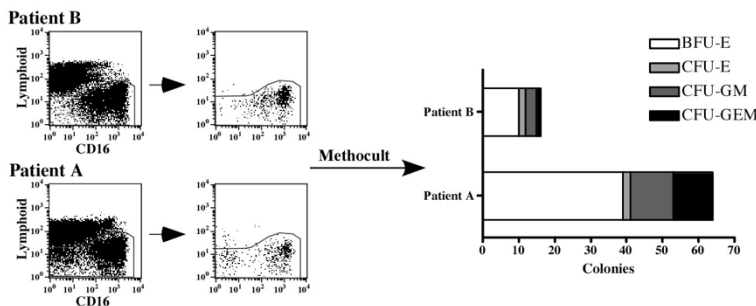

**C**

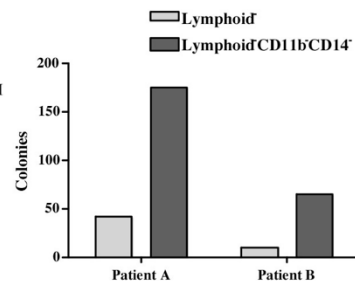

**Figure S3. Purification of human peripheral blood monocyte progenitors by flow cytometry.** **A)** Human peripheral blood (PB) mononuclear cells were obtained after dextran gradient and RBC lysis. Gating strategy to enrich for PB monocytes includes removal of dead cells with Propidium Iodide (PI) staining, doublets (FSc-W and FSc-A), granulocytes (SSc-A high) and lymphoid cells (using CD3, CD19, and CD56 antibodies). Cells within these gates were used to dissect myeloid populations using the myeloid markers CD14 and CD11b which were analyzed in the context of other markers, their ability to progress to terminally differentiated myeloid cells and for their progenitor activity. Finer dissections within the identified progenitor population were analyzed in the same fashion using SSc and CD115



antibodies. **B) and C)** Lymphoid negative cells, from two healthy representative individuals, were sorted and plated at equal numbers into methylcellulose and colonies enumerated for BFU-E, CFU-E, CFU-GM and CFU-GEM. **C)** The progenitor activity within the lymphoid negative compartment was further enriched by sorting for CD11bCD14 DN cells. Equal numbers of cells were plated for each population into methylcellulose and total colonies enumerated at day 10 of culture.

BFU-E, burst-forming unit-erythroid; CFU- colony forming unit; E, erythrocyte; G, granulocyte; GEM, granulocyte, erythrocyte, and monocyte; GM, granulocyte and monocyte; and M, monocyte.
